# Supplementary material for: An Improved Method for the Extraction of Nucleic Acids from Plant Tissue without Grinding to Detect Plant Viruses and Viroids
Source: MDPI journal article supplement (doi:10.3390/plants10122683), 2021-12-06
Supplement: s1 [file s1]

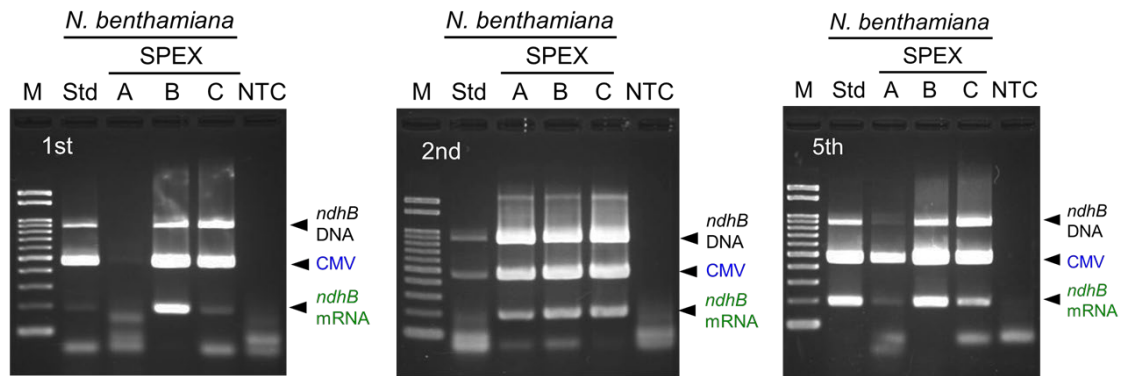

**Figure S1.** Comparison of incubation conditions in the SPEX method for detecting cucumber mosaic virus (CMV) in *N. benthamiana*. CMV cDNA was detected simultaneously with the cDNA of *ndhB* mRNA by RT-PCR using Go-to DNA polymerase from nucleic acids extracted from leaves using the standard PEX (lane Std), and SPEX-A, SPEX-B, and SPEX-C (lanes A–C) methods. Duplex RT-PCR products were electrophoresed in a 2% agarose gel. Lanes, NTC: no template control; M: molecular size marker Gene Ladder 100.

**Table S1. List of primers used in PCR**

| Target                                   | Primer name                    | Primer sequence 5'-3'                                 | Annealing temp. (°C) | Size of PCR product (bp) | Ref.       |
|------------------------------------------|--------------------------------|-------------------------------------------------------|----------------------|--------------------------|------------|
| chrysanthemum stunt viroid (CSVd)        | CSV-1P<br>CSV-1M               | CTTAGGACCCCACTCCTGCG<br>CCGCGATCTCGTCGGACTTC          | 61                   | 348                      | [11,35]    |
| citrus exocortis viroid (CEVd)           | PCEV-1P<br>PCEV-1M             | GCTCCACATCCGATCGTC<br>TGGACGCCAGTGATCCGC              | 50                   | 332                      | [11]       |
| potato virus Y (PVY) <i>coat protein</i> | PVYCP6P<br>PVYCP6M             | CGTCCAAAATGAGAATGCC<br>TCTTGTTACTGATGCCAC             | 55                   | 577                      | [37]       |
| cucumber mosaic virus (CMV) <i>2a</i>    | CM2a-1P<br>CM2a-1M             | TTCCAGAGATGCCTTCGAGAACG<br>TCCATCACCTTAGCTTCCATGTTG   | 55                   | 470                      | This study |
| apple fruit crinkle viroid (AFCVd)       | AFCV-5P<br>AFCV-5M             | GCCCTGGGCTCCAAC TAGTGG<br>ACTGGTTGGGACCGCTGGGAC       | 55                   | 308                      | This study |
| hop latent viroid (HLVd)                 | HLVd-1P<br>HLVd-1M             | GGATACAAC TCTTGAGCGCC<br>TAGTTTCCAAC TCCGGCTGG        | 50                   | 250                      | [16]       |
| hop latent virus (HpLV) <i>replicase</i> | HLV-5P<br>HLV-9M               | GCAAAAGCAGCGCAGAGTATAG<br>TCGCCTGAGAAATGCATTATAGC     | 50                   | 359                      | [15]       |
| <i>ndhB</i> <sup>a</sup> mRNA            | AtropaNad2.1a<br>AtropaNad2.2b | GGACTCCTGACGTATACGAAGGATC<br>AGCAATGAGATTCCCCAATATCAT | 50–61                | 188                      | [12,13]    |

<sup>a</sup> NADH dehydrogenase subunit 2 gene
